# Supplementary material
Source: Springer Nature journal article supplement (https://www.springermedizin.de/resource/supplementary/13098_2013_268_MOESM1_ESM.pdf/9670864)

**A**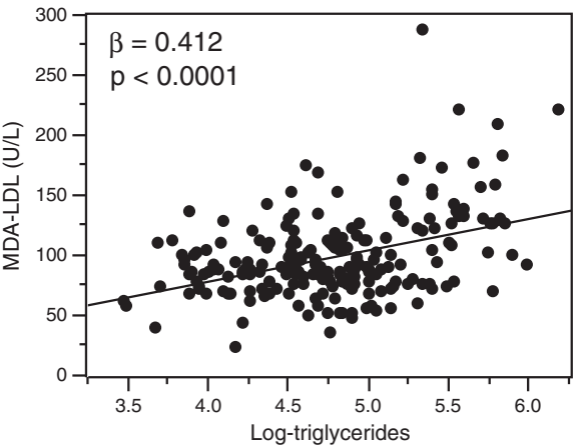**B**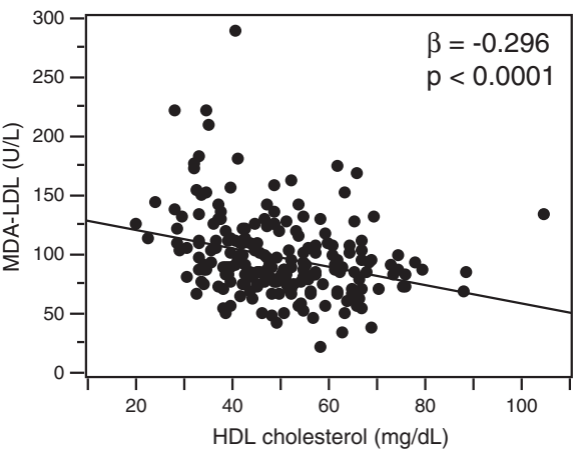**C**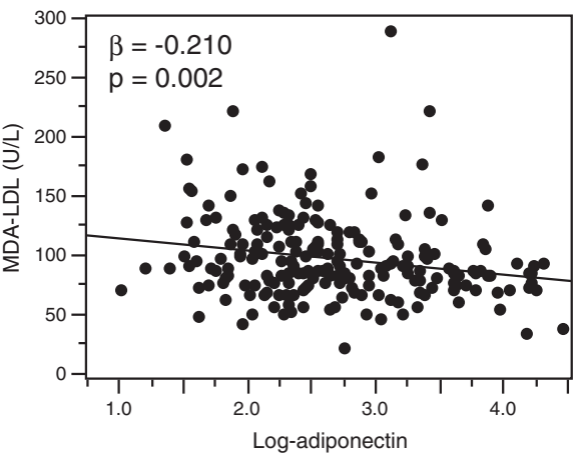

Supplement: MOESM1 [file 9670864]
